# Supplementary material for: Abiotic and Herbivory Combined Stress in Tomato: Additive, Synergic and Antagonistic Effects and Within-Plant Phenotypic Plasticity
Source: MDPI journal article supplement (doi:10.3390/life12111804), 2022-11-07
Supplement: s1 [file s1]

**Table S2** - Volatile organic compounds (Area %) from the leaves of tomato plants detected in at least two replicates out of three at each sampling time (t0, t1, t3 and t8) and treatments (ABIO, BIO, COMB and CTR).

| N  | Common name                            | t0     |        |        |        | t1     |        |        |        | t3     |        |        |        | t8     |        |        |        |
|----|----------------------------------------|--------|--------|--------|--------|--------|--------|--------|--------|--------|--------|--------|--------|--------|--------|--------|--------|
|    |                                        | ABIO   | BIO    | COMB   | CTR    |
| 1  | (+)-4-Carene                           | 1.161  | 2.199  | 1.508  | 2.438  | 1.916  | 2.054  | 1.300  | 2.062  | 1.570  | 2.081  | 0.872  | 1.882  | 1.321  | 1.898  | 1.443  | 1.717  |
| 2  | (2E)-2-Hexenyl propionate              | -      | -      | -      | -      | -      | -      | -      | -      | -      | -      | -      | -      | -      | 0.154  | 0.010  | -      |
| 3  | (E) - 2 hexen - 1 ol                   | 4.689  | 10.781 | 2.015  | 8.795  | 2.270  | 4.651  | 7.857  | 8.242  | 1.035  | 4.897  | 5.640  | 11.923 | 0.558  | 13.908 | 8.854  | 12.541 |
| 4  | (E) beta ocimene                       | 0.066  | 0.510  | 0.280  | 0.682  | 0.584  | 0.252  | 1.945  | 5.035  | 0.603  | 0.401  | 0.925  | 0.401  | 0.966  | 0.348  | 0.780  | 0.168  |
| 5  | 1,3,7-Nonatriene, 4,8-dimethyl-, (3E)- | -      | -      | 0.054  | 0.154  | 0.113  | 0.029  | 0.449  | 0.005  | 0.136  | -      | 0.149  | -      | 0.163  | -      | 0.123  | -      |
| 6  | 3-Hexen-1-ol, propanoate, (3Z)-        | 0.124  | 0.297  | -      | 0.475  | -      | 0.319  | -      | 0.181  | 0.014  | 0.233  | 0.206  | 0.249  | 0.032  | 0.073  | 0.071  | 0.192  |
| 7  | alfa copaene                           | 0.087  | 0.018  | 0.031  | 0.036  | 0.073  | 0.040  | 0.032  | 0.040  | 0.059  | 0.021  | 0.080  | 0.015  | 0.026  | 0.048  | 0.033  | 0.049  |
| 8  | alfa cubebene                          | -      | 0.005  | 0.002  | -      | 0.002  | -      | 0.002  | -      | -      | -      | -      | -      | 0.002  | -      | -      | -      |
| 9  | Alloaromadendrene                      | -      | 0.002  | 0.006  | 0.003  | -      | -      | -      | -      | 0.005  | -      | -      | -      | -      | -      | -      | -      |
| 10 | allo-ocimene                           | 0.094  | 0.146  | 0.135  | 0.160  | 0.207  | 0.135  | 0.433  | 0.129  | 0.190  | 0.065  | 0.221  | 0.189  | 0.222  | 0.056  | 0.167  | 0.117  |
| 11 | alpha guaiene                          | 0.135  | 0.138  | 0.248  | 0.073  | 0.182  | 0.037  | 0.281  | 0.073  | 0.134  | 0.049  | 0.221  | 0.029  | 0.084  | 0.024  | 0.108  | 0.023  |
| 12 | alpha gurjunene                        | -      | -      | 0.008  | -      | -      | -      | -      | -      | -      | -      | -      | -      | -      | -      | -      | -      |
| 13 | alpha humulene                         | 0.948  | 1.486  | 2.592  | 0.724  | 2.089  | 0.569  | 2.882  | 0.821  | 1.896  | 0.713  | 1.815  | 0.340  | 0.707  | 0.427  | 1.204  | 0.363  |
| 14 | alpha pinene                           | 1.962  | 2.2232 | 1.720  | 2.613  | 2.596  | 2.630  | 1.988  | 5.089  | 2.333  | 2.488  | 1.968  | 4.479  | 2.521  | 2.233  | 2.249  | 2.519  |
| 15 | alpha selinene                         | -      | -      | -      | -      | -      | -      | -      | -      | -      | -      | -      | -      | -      | -      | 0.003  | -      |
| 16 | alpha terpinene                        | 23.117 | 22.598 | 21.464 | 27.941 | 18.196 | 26.618 | 17.120 | 22.316 | 22.055 | 20.163 | 19.942 | 22.084 | 24.387 | 23.187 | 21.425 | 24.561 |
| 17 | aromadendrene                          | -      | -      | 0.100  | 0.033  | 0.114  | -      | 0.168  | 0.017  | 0.149  | 0.147  | 0.094  | 0.013  | 0.025  | 0.004  | 0.084  | 0.045  |
| 18 | beta cadinene                          | 0.086  | 0.084  | 0.137  | 0.063  | 0.083  | 0.034  | 0.279  | 0.043  | 0.109  | 0.017  | 0.197  | 0.008  | 0.088  | 0.018  | 0.091  | 0.047  |
| 19 | beta elemene                           | 0.257  | 0.130  | 0.257  | 0.126  | 0.213  | 0.018  | 0.337  | 0.056  | 0.168  | 0.053  | 1.137  | 0.019  | 0.093  | 0.025  | 0.137  | 0.112  |
| 20 | beta phellandrene                      | 51.056 | 39.824 | 42.917 | 44.314 | 19.965 | 52.715 | 38.307 | 45.478 | 48.506 | 57.142 | 41.944 | 46.486 | 56.737 | 48.859 | 46.358 | 49.086 |
| 21 | beta pinene                            | 5.432  | 2.481  | 2.781  | 1.851  | 1.043  | 2.502  | 1.922  | 2.654  | 2.087  | 2.154  | 1.889  | 6.098  | 2.602  | 2.638  | 1.890  | 2.323  |

|    |                             |       |        |        |       |        |       |        |       |        |       |        |       |       |       |       |       |
|----|-----------------------------|-------|--------|--------|-------|--------|-------|--------|-------|--------|-------|--------|-------|-------|-------|-------|-------|
| 22 | caryophyllene alcohol       | -     | -      | 0.007  | -     | -      | 0.032 | 1.601  | -     | -      | 0.007 | -      | -     | -     | 0.004 | 0.002 | -     |
| 23 | delta cadinene              | -     | -      | 0.035  | -     | 0.006  | -     | 0.007  | -     | -      | -     | -      | -     | 0.007 | -     | 0.017 | -     |
| 24 | delta elemene               | 0.836 | 1.003  | 2.875  | 0.584 | 2.285  | 0.308 | 3.013  | 0.537 | 1.981  | 0.582 | 2.929  | 0.287 | 1.035 | 0.225 | 1.861 | 0.439 |
| 25 | Diocetyl ether              | -     | -      | -      | -     | -      | -     | -      | -     | -      | -     | -      | 0.099 | -     | -     | -     | 0.449 |
| 26 | dodecanal                   | 0.111 | -      | -      | -     | -      | -     | -      | -     | -      | -     | -      | -     | -     | -     | -     | -     |
| 27 | Dodecane                    | 0.118 | -      | -      | -     | -      | -     | -      | -     | -      | -     | -      | -     | -     | -     | -     | -     |
| 28 | Dodecane, 2,6,11-trimethyl- | 0.158 | 0.050  | 0.022  | 0.059 | 0.023  | 0.062 | 0.012  | 0.044 | 0.020  | 0.072 | 0.045  | 0.016 | 0.018 | 0.004 | 0.017 | 0.050 |
| 29 | E $\beta$ -Caryophyllene    | 5.271 | 10.632 | 15.863 | 4.919 | 12.195 | 4.189 | 11.917 | 4.980 | 11.114 | 5.483 | 10.191 | 4.347 | 4.550 | 2.705 | 7.376 | 2.304 |
| 30 | hexadecane                  | 0.088 | -      | -      | 0.015 | -      | -     | -      | -     | -      | -     | -      | -     | -     | -     | -     | -     |
| 31 | Dendrolasin                 | -     | 0.202  | 0.189  | 0.215 | 0.133  | 0.520 | 0.130  | -     | 0.553  | 0.124 | 0.843  | 0.084 | 0.162 | 0.260 | 0.156 | 0.846 |
| 32 | gamma elemene               | 0.261 | 0.184  | 0.580  | 0.282 | 0.662  | 0.108 | 0.581  | 0.206 | 0.485  | 0.163 | 0.141  | 0.049 | 0.075 | 0.078 | 0.240 | 0.056 |
| 33 | gamma terpinene             | 0.117 | 0.343  | 0.207  | 0.509 | 0.423  | 0.467 | 0.181  | 0.345 | 0.344  | 0.487 | 0.437  | 0.470 | 0.355 | 0.299 | 0.175 | 0.392 |
| 34 | germacrene D                | -     | -      | 0.027  | -     | -      | -     | -      | -     | 0.007  | -     | -      | -     | 0.004 | -     | 0.003 | -     |
| 35 | hexyl propionate            | -     | 0.098  | -      | -     | -      | -     | -      | -     | -      | -     | -      | -     | 0.040 | 0.092 | 0.010 | -     |
| 36 | Longifolene                 | -     | 0.003  | -      | -     | -      | -     | -      | -     | -      | -     | -      | -     | -     | -     | -     | -     |
| 37 | methyl salicylate           | -     | -      | -      | -     | -      | -     | -      | -     | -      | -     | 4.159  | -     | 0.332 | 0.534 | 0.913 | -     |
| 38 | myrcene                     | 3.089 | 4.035  | 3.299  | 2.183 | 3.791  | 1.344 | 6.460  | 1.280 | 3.735  | 2.015 | 3.459  | 1.620 | 2.424 | 1.588 | 3.700 | 1.159 |
| 39 | o - cymene                  | -     | -      | -      | -     | 0.207  | -     | -      | -     | 0.215  | -     | -      | -     | -     | -     | -     | 0.073 |
| 40 | terpinolene                 | 0.306 | 0.389  | 0.348  | 0.396 | 0.416  | 0.277 | 0.474  | 0.246 | 0.272  | 0.368 | 0.290  | 0.348 | 0.361 | 0.267 | 0.329 | 0.282 |
| 41 | tridecane                   | 0.072 | -      | -      | 0.024 | -      | -     | -      | -     | -      | -     | -      | -     | -     | -     | -     | -     |
| 42 | Z beta caryophyllene        | 0.021 | -      | 0.088  | 0.055 | 0.098  | 0.048 | 0.092  | 0.035 | 0.056  | 0.044 | 0.084  | 0.008 | 0.015 | 0.010 | 0.050 | 0.052 |
| 43 | $\beta$ -copaene            | -     | -      | -      | -     | -      | -     | -      | 0.008 | -      | -     | -      | -     | -     | -     | -     | -     |
| 44 | $\gamma$ gurjunene          | -     | -      | 0.004  | 0.001 | 0.007  | -     | 0.019  | -     | 0.014  | -     | -      | 0.001 | 0.010 | -     | -     | 0.001 |
| 45 | $\gamma$ muurolene          | 0.081 | 0.056  | 0.197  | 0.029 | 0.098  | 0.001 | 0.207  | 0.056 | 0.137  | 0.005 | 0.113  | -     | 0.068 | 0.015 | 0.115 | 0.004 |
