# Supplementary material for: Abiotic and Herbivory Combined Stress in Tomato: Additive, Synergic and Antagonistic Effects and Within-Plant Phenotypic Plasticity
Source: MDPI journal article supplement (doi:10.3390/life12111804), 2022-11-07
Supplement: s1 [file s1]

## Vascular pattern

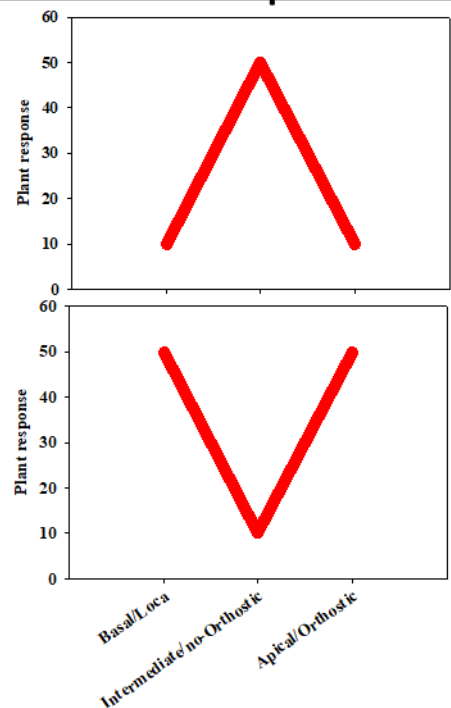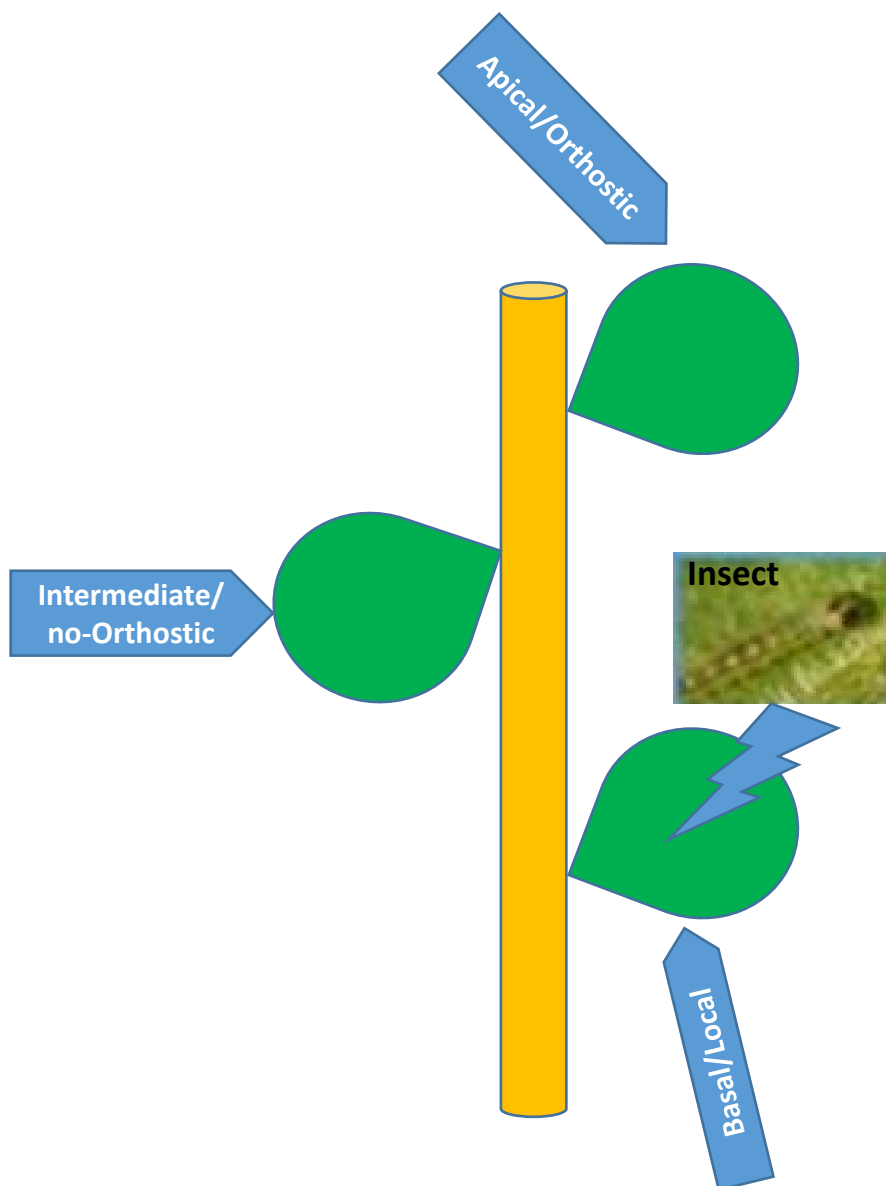

## No pattern

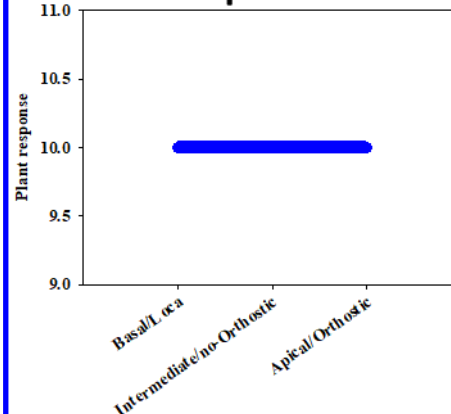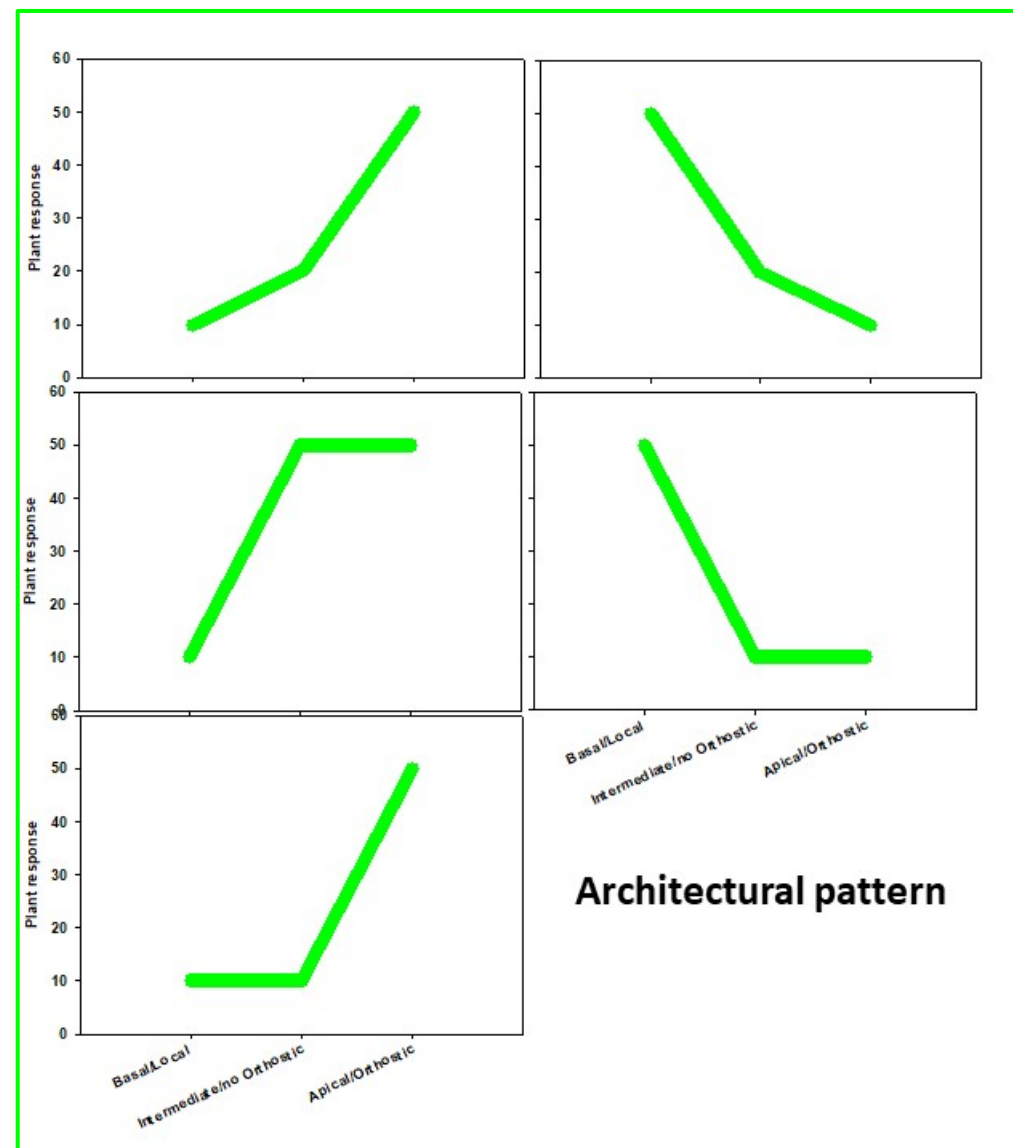

Figure S5 – Tomato responses to the experimental conditions resembling the vascular pattern (red line) or architectural pattern (green line) or no pattern (blue line).
