# Supplementary material for: Abiotic and Herbivory Combined Stress in Tomato: Additive, Synergic and Antagonistic Effects and Within-Plant Phenotypic Plasticity
Source: MDPI journal article supplement (doi:10.3390/life12111804), 2022-11-07
Supplement: s1 [file s1]

**Table S4** - PERMANOVA pairwise comparison between treatments (ABIO, BIO, COMB and CTR) within each time of exposure (0, 1, 3 and 8 days).

| <b>Pairs</b>     | <b>F. Model</b> | <b>R2</b>   | <b>P value</b> | <b>P adjusted</b> |
|------------------|-----------------|-------------|----------------|-------------------|
| ABIO 0 vs BIO 0  | 2.36754570      | 0.128898316 | 0.065          | 0.15230769        |
| ABIO 0 vs COMB 0 | 1.73298156      | 0.097726462 | 0.159          | 0.23850000        |
| ABIO 0 vs CTR 0  | 1.91671243      | 0.106979025 | 0.145          | 0.22894737        |
| ABIO 1 vs BIO 1  | 2.25116265      | 0.123343520 | 0.099          | 0.19161290        |
| ABIO 1 vs COMB 1 | 1.68353749      | 0.095203660 | 0.150          | 0.23376623        |
| ABIO 1 vs CTR 1  | 1.69383507      | 0.095730240 | 0.143          | 0.22880000        |
| ABIO 3 vs BIO 3  | 1.06694916      | 0.062515517 | 0.289          | 0.35030303        |
| ABIO 3 vs COMB 3 | 1.57385814      | 0.089556780 | 0.197          | 0.26696629        |
| ABIO 3 vs CTR 3  | 2.05710766      | 0.113922323 | 0.136          | 0.22054054        |
| ABIO 8 vs BIO 8  | 1.65593317      | 0.093789049 | 0.190          | 0.26696629        |
| ABIO 8 vs COMB 8 | 2.22174702      | 0.121928321 | 0.090          | 0.18620690        |
| ABIO 8 vs CTR 8  | 4.25785175      | 0.210182787 | 0.018          | 0.06967742        |
| BIO 0 vs COMB 0  | 0.72193155      | 0.043172737 | 0.473          | 0.51459459        |
| BIO 0 vs CTR 0   | 0.24011804      | 0.014785486 | 0.831          | 0.83798319        |
| BIO 1 vs COMB 1  | 2.42871064      | 0.131789504 | 0.066          | 0.15230769        |
| BIO 1 vs CTR 1   | 1.31246112      | 0.075810199 | 0.259          | 0.32041237        |
| BIO 3 vs COMB 3  | 1.65423201      | 0.093701726 | 0.186          | 0.26696629        |
| BIO 3 vs CTR 3   | 1.95860104      | 0.109062005 | 0.122          | 0.20054795        |
| BIO 8 vs COMB 8  | 4.73388820      | 0.228316472 | 0.024          | 0.08228571        |
| BIO 8 vs CTR 8   | 9.79313456      | 0.379679893 | 0.004          | 0.04000000        |
| COMB 0 vs CTR 0  | 0.70477038      | 0.042189767 | 0.473          | 0.51459459        |
| COMB 1 vs CTR 1  | 3.05268470      | 0.160223336 | 0.027          | 0.08756757        |
| COMB 3 vs CTR 3  | 5.21797207      | 0.245922280 | 0.006          | 0.04235294        |
| COMB 8 vs CTR 8  | 9.03428123      | 0.360876398 | 0.001          | 0.04000000        |
