# Supplementary material for: Abiotic and Herbivory Combined Stress in Tomato: Additive, Synergic and Antagonistic Effects and Within-Plant Phenotypic Plasticity
Source: MDPI journal article supplement (doi:10.3390/life12111804), 2022-11-07
Supplement: s1 [file s1]

**Table S3** - Permanova results of the VOC emission of tomato plants exposed to different stress (Treatments) and time of exposure (Time).

|                   | Df  | Sum of square | R2      | F      | Pr(>F)  |
|-------------------|-----|---------------|---------|--------|---------|
| Treatments        | 3   | 0.8661        | 0.06288 | 3.3117 | 0.003** |
| Time              | 1   | 0.2228        | 0.01618 | 2.5562 | 0.048*  |
| Treatments x Time | 3   | 0.8291        | 0.06020 | 3.1704 | 0.007** |
| Residual          | 136 | 11.8555       | 0.86075 |        |         |
| Total             | 143 | 13.7736       | 1.00000 |        |         |
