# Supplementary material for: Abiotic and Herbivory Combined Stress in Tomato: Additive, Synergic and Antagonistic Effects and Within-Plant Phenotypic Plasticity
Source: MDPI journal article supplement (doi:10.3390/life12111804), 2022-11-07
Supplement: s1 [file s1]

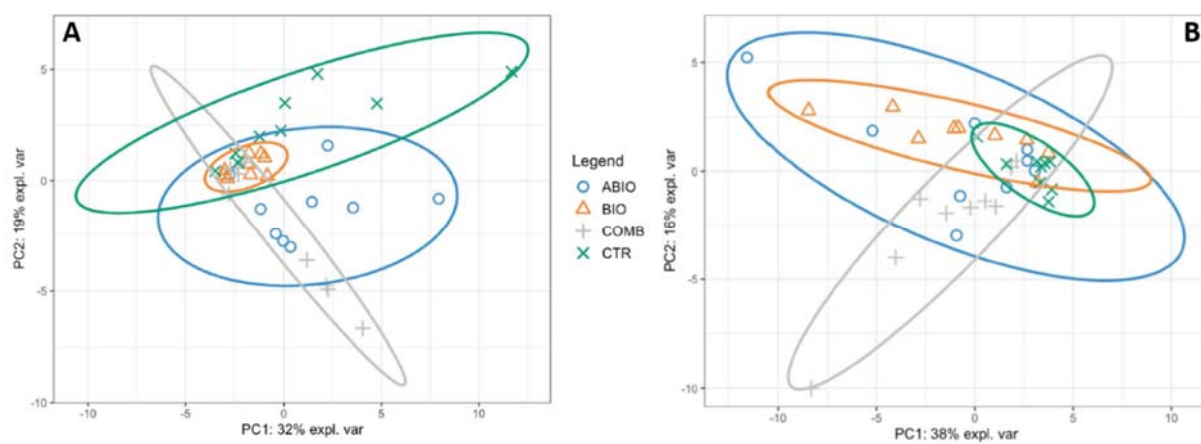

**Figure S4** - Principal component analysis applied to volatiles emission data obtained from tomato leaves treated with different stress (ABIO, BIO, COMB) or not treated (CTR) for 3 (A) and 8 days (B) of exposure.
