# Supplementary material for: Abiotic and Herbivory Combined Stress in Tomato: Additive, Synergic and Antagonistic Effects and Within-Plant Phenotypic Plasticity
Source: MDPI journal article supplement (doi:10.3390/life12111804), 2022-11-07
Supplement: s1 [file s1]

**Table S1** - Volatile organic compounds identified using gas chromatography/mass spectrometry (GC/MS) analysis by HS/SPME method in the leaves of the tomato plants treated with abiotic, biotic and combined stress. RT, retention time; KI, retention index.

| common name                            | IUPAC name                                                                            | Class         | RT (min) | KI   |
|----------------------------------------|---------------------------------------------------------------------------------------|---------------|----------|------|
| (E) - 2 hexen - 1 ol                   | (E)-hex-2-en-1-ol                                                                     | Alcohol       | 5,97     | 873  |
| alpha pinene                           | 2,6,6-trimethylbicyclo[3.1.1]hept-2-ene                                               | monoterpene   | 7,36     | 939  |
| beta pinene                            | 6,6-dimethyl-2-methylidenebicyclo[3.1.1]heptane                                       | monoterpene   | 8,22     | 981  |
| Myrcene                                | 7-methyl-3-methylideneocta-1,6-diene                                                  | monoterpene   | 8,61     | 993  |
| alpha terpinene                        | 1-methyl-4-propan-2-ylcyclohexa-1,3-diene                                             | monoterpene   | 8,85     | 1018 |
| (+)-4-Carene                           | 4,7,7-Trimethylbicyclo[4.1.0]hept-2-ene                                               | monoterpene   | 9,19     | 1022 |
| o – cymene                             | 1-methyl-2-propan-2-ylbenzene                                                         | monoterpene   | 9,51     | 1026 |
| beta phellandrene                      | 3-methylidene-6-propan-2-ylcyclohexene                                                | monoterpene   | 9,59     | 1033 |
| (E) beta ocimene                       | (3E)-3,7-dimethylocta-1,3,6-triene                                                    | monoterpene   | 9,98     | 1050 |
| gamma terpinene                        | 1-methyl-4-propan-2-ylcyclohexa-1,4-diene                                             | monoterpene   | 10,3     | 1062 |
| Terpinolene                            | 1-methyl-4-propan-2-ylidenecyclohexene                                                | monoterpene   | 11,05    | 1090 |
| 3-Hexen-1-ol, propanoate, (3Z)-        | [(Z)-hex-3-enyl] propanoate                                                           | Ester         | 11,29    | 1103 |
| Hexyl propionate                       | hexyl propanoate                                                                      | Ester         | 11,34    | 1110 |
| (2E)-2-Hexenyl propionate              | [(E)-hex-2-enyl] propanoate                                                           | Ester         | 11,5     | 1112 |
| 1,3,7-Nonatriene, 4,8-dimethyl-, (3E)- | (3E)-4,8-dimethylnona-1,3,7-triene                                                    | hydrocarbon   | 11,67    | 1119 |
| allo-ocimene                           | (4E,6E)-2,6-dimethylocta-2,4,6-triene                                                 | monoterpene   | 11,71    | 1133 |
| Dodecane                               | dodecane                                                                              | hydrocarbon   | 13,6     | 1200 |
| methyl salicylate                      | methyl 2-hydroxybenzoate                                                              | Ester         | 13,69    | 1193 |
| Dodecanal                              | dodecanal                                                                             | Aldehydes     | 13,94    | 1204 |
| Dodecane, 2,6,11-trimethyl-            | 2,6,11-trimethyldodecane                                                              | hydrocarbon   | 15,58    | 1275 |
| Tridecane                              | tridecane                                                                             | hydrocarbon   | 16,63    | 1302 |
| delta elemene                          | (3R,4R)-4-ethenyl-4-methyl-1-propan-2-yl-3-prop-1-en-2-ylcyclohexene                  | sesquiterpene | 17       | 1340 |
| alfa copaene                           | (2R,6R)-1,3-dimethyl-8-propan-2-yltricyclo[4.4.0.02,7]dec-3-ene                       | sesquiterpene | 17,89    | 1376 |
| alfa cubebene                          | (5S,6R,7S,10R)-4,10-dimethyl-7-propan-2-yltricyclo[4.4.0.01,5]dec-3-ene               | sesquiterpene | 17,89    | 1344 |
| beta elemene                           | (1S,2S,4R)-1-ethenyl-1-methyl-2,4-bis(prop-1-en-2-yl)cyclohexane                      | sesquiterpene | 18,22    | 1393 |
| alpha gurjunene                        | (1aR,4R,4aR,7bS)-1,1,4,7-tetramethyl-1a,2,3,4,4a,5,6,7b-octahydrocyclopropa[e]azulene | sesquiterpene | 18,53    | 1410 |

|                       |                                                                                          |               |       |      |
|-----------------------|------------------------------------------------------------------------------------------|---------------|-------|------|
| Z beta caryophyllene  | (1S,4E,9S)-4,11,11-trimethyl-8-methylidenebicyclo[7.2.0]undec-4-ene                      | sesquiterpene | 18,6  | 1416 |
| Longifolene           | 3,3,7-trimethyl-8-methylidenetricyclo[5.4.0.02,9]undecane                                | sesquiterpene | 18,61 | 1404 |
| E β-Caryophyllene     | (1R,4E,9S)-4,11,11-trimethyl-8-methylidenebicyclo[7.2.0]undec-4-ene                      | sesquiterpene | 18,88 | 1428 |
| gamma elemene         | (1S,2S)-1-ethenyl-1-methyl-4-propan-2-ylidene-2-prop-1-en-2-ylcyclohexane                | sesquiterpene | 19,06 | 1431 |
| β-copaene             | (1S,6S,7S,8S)-1-methyl-3-methylidene-8-propan-2-yltricyclo[4.4.0.02,7]decane             | sesquiterpene | 19,07 | 1431 |
| alpha guaiene         | (1S,4S,7R)-1,4-dimethyl-7-prop-1-en-2-yl-1,2,3,4,5,6,7,8-octahydroazulene                | sesquiterpene | 19,35 | 1439 |
| aromadendrene         | 1,1,7-trimethyl-4-methylidene-2,3,4a,5,6,7,7a,7b-octahydro-1aH-cyclopropa[e]azulene      | sesquiterpene | 19,5  | 1445 |
| Alloaromadendrene     | 1,1,7-trimethyl-4-methylidene-2,3,4a,5,6,7,7a,7b-octahydro-1aH-cyclopropa[e]azulene      | sesquiterpene | 19,52 | 1462 |
| alpha humulene        | (1E,4E,8E)-2,6,6,9-tetramethylcycloundeca-1,4,8-triene                                   | sesquiterpene | 19,61 | 1456 |
| γ muurolene           | (1S,4aS,8aR)-7-methyl-4-methylidene-1-propan-2-yl-2,3,4a,5,6,8a-hexahydro-1H-naphthalene | sesquiterpene | 20,08 | 1477 |
| γ gurjunene           | 1,4-dimethyl-7-prop-1-en-2-yl-1,2,3,3a,4,5,6,7-octahydroazulene                          | sesquiterpene | 20,12 | 1477 |
| germacrene D          | (1E,6E,8S)-1-methyl-5-methylidene-8-propan-2-ylcyclodeca-1,6-diene                       | sesquiterpene | 20,31 | 1481 |
| beta cadinene         | (1S,4aR,8aS)-4,7-dimethyl-1-propan-2-yl-1,2,4a,5,8,8a-hexahydronaphthalene               | sesquiterpene | 20,36 | 1500 |
| alpha selinene        | (3R,4aR,8aR)-5,8a-dimethyl-3-prop-1-en-2-yl-2,3,4,4a,7,8-hexahydro-1H-naphthalene        | sesquiterpene | 20,41 | 1500 |
| delta cadinene        | (1S,8aR)-4,7-dimethyl-1-propan-2-yl-1,2,3,5,6,8a-hexahydronaphthalene                    | sesquiterpene | 21,01 | 1524 |
| caryophyllene alcohol | 4,4,8-trimethyltricyclo[6.3.1.02,5]dodecan-1-ol                                          | Alcohol       | 21,87 | 1571 |
| Dendrolasin           | 3-[(3E)-4,8-dimethylnona-3,7-dienyl]furan                                                | Ether         | 22,08 | 1575 |
| hexadecane            | hexadecane                                                                               | hydrocarbon   | 22,37 | 1600 |
| Dioctyl ether         | 1-octoxyoctane                                                                           | Ether         | 23,69 | 1660 |
