# Supplementary figures and images for: Abiotic and Herbivory Combined Stress in Tomato: Additive, Synergic and Antagonistic Effects and Within-Plant Phenotypic Plasticity
Source: MDPI journal article supplement (doi:10.3390/life12111804), 2022-11-07

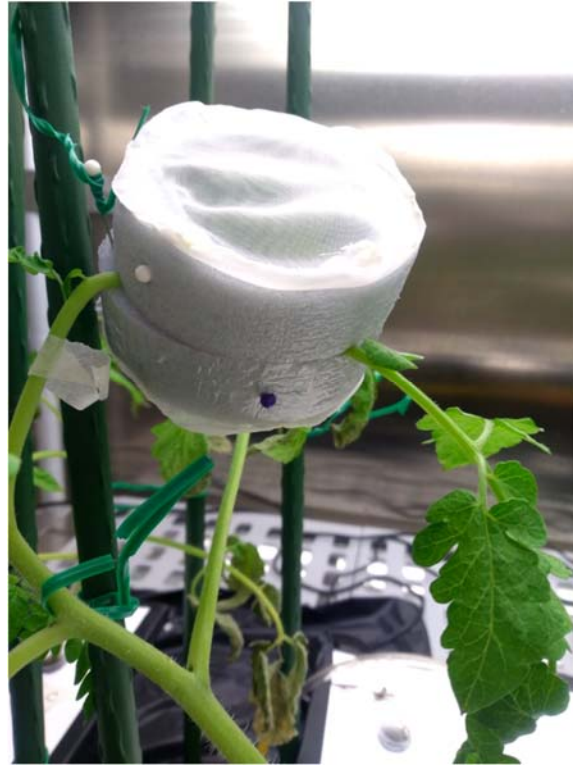

**Figure S2** - Trap for *Tuta absoluta*'s larva.

Supplement: s1 [file s1]
